# Supplementary material
Source: PubMed Central journal article supplement (PMC5258825)
Supplement: NIHMS826187-supplement-Supp_info.pdf [file NIHMS826187-supplement-Supp_info.pdf]

1 **Supplemental Figure legends:**

2 **FIGURE S1. Antibody mediated depletion of CD4<sup>+</sup> T cells in C57BL6/J treated with CCl<sub>4</sub>. (A)**

3 Antibody mediated CD4<sup>+</sup> T cell depletion: days -1, and day 0 mice were administered 0.5mg of anti-  
4 CD4 (Clone GK1.5) I.P. and CCl<sub>4</sub> treatment beginning day 0, every three days- 12 doses per animal.  
5 On days 14 and 28, animals were administered anti-CD4 I.P. **(B)** Representative FACS plots of  
6 antibody mediated CD4 depletion in liver (top) and spleen (bottom) at time of animal sacrifice, blood  
7 was monitored throughout the study as indicated in the methods section (data not shown). Data are  
8 representative of at least 3 independent experiments with 3-5 animals per indicated group. Gated on  
9 live non-autofluorescent CD3<sup>+</sup> (T cell compartment). **(C)** Mouse livers were processed for liver non-  
10 parenchymal cells (NPCs) isolation as described in Materials and Methods. After density gradient  
11 enrichment, NPCs were stained with anti-CD45 and analyzed on a FACSAria Cell Sorter II (BD  
12 Bioscience) equipped with a UV laser. HSCs were identified as Live, UV autofluorescence-positive  
13 (UVAF<sup>+</sup>), CD45 negative population. For the detection of HSC-associated activation marker,  
14 purified liver cells were stained intracellularly with  $\alpha$ -SMA. The expression of  $\alpha$ -SMA was analyzed  
15 on gated HSC population using FlowJo software (Treestar, Ashland, OR). Data shown is  
16 representative of 3 independent experiments (n=3-5 mice per group). \*\*\*p<0.0005, two-tailed Mann-  
17 Whitney *U* test. Where applicable, error bars represent SEM.

18

19 **FIGURE S2. CCl<sub>4</sub> treatment primarily alters the hepatic B cell compartment. (A)** Spontaneous

20 IgG production from splenic lymphocytes; ELISPOT was performed as described. **(B)** Comparison of  
21 fibrotic liver ( $795 \pm 291$  ASC/ $10^6$ ) versus animal-matched splenic ( $342 \pm 137$  ASC/ $10^6$ ) frequencies of  
22 spontaneous IgG production. All data are representative of three independent experiments, n=3-5  
23 animals per group. Statistical significance was determined by two-tailed Mann-Whitney *U* Test,  
24 \*\*\*p<0.005.

25

26 **FIGURE S3. Increased B cell activation and survival during liver fibrosis.** (A) Phenotypic  
27 analysis of live, non-autofluorescent, CD19+ B cells from non-fibrotic (UNTX) and fibrotic (TX)  
28 livers; left. Right, analysis of Ki-67 and CD44 expression directly *ex vivo* within the CD95+ IgD-  
29 population. Fibrotic liver B cells have an increased frequency of CD95+IgD- B cells in comparison to  
30 non-fibrotic controls, far right (\*\*p<0.0005, two-tailed Mann-Whitney *U* Test). Each dot represents  
31 one mouse; data shown are from 3 independent experiments, n=3-5 animals per group. (B) Direct *ex*  
32 *vivo* analysis of apoptosis via positive staining for Annexin-V and Propidium Iodide (PI) on hepatic  
33 CD19+ B cells. Gates were determined from single stained positive and negative controls. FACS  
34 plots and graphs are representative of 2 independent experiments, n =3-5 per group (\*\*p<0.0005,  
35 two-tailed Mann-Whitney *U* Test).

36

37 **FIGURE S4. CD25 negative CD4+ T cell interaction with B cells is not influenced by fibrosis.**  
38 (A) Foxp3 expression on bead-enriched CD4+CD25+ T cells, representative of indicated organs from  
39 5 independent experiments (pooled cells from n=3-5 per group). (B) Total CD4+ T cell compartment  
40 expression of CD25 and Foxp3 prior to depletion of CD25+ fraction (top), and Foxp3 expression in  
41 CD25 negative fraction of CD4+ T cell compartment (bottom) prior to co-culture with B cells. Data  
42 representative of 5 independent experiments of pooled organs from n=3-5 animals per group (C) Ki-  
43 67 and CD44 co-expression on live, B220+ B cells following 5 days of stimulation with 2  $\mu$ g/mL  
44 LPS and indicated CD4+ T cells. Total CD4+ T cells from spleen and untreated liver reduce  
45 expression of activation markers, while fibrotic liver permits activation (left, top). CD25-depleted  
46 fraction permits B cell activation to the same extent irrespective of origin. Statistical significance is  
47 relative to B cell activation with LPS in the absence of CD4+ T cells (\*\*p<0.0005, two-tailed  
48 Mann-Whitney *U* Test). (D) IgG production from B cells cultured with total CD4+ T cell

49 compartment (top) and CD25-depleted fractions (bottom). All data are representative of at least 5  
50 independent experiments with indicated cell populations pooled from n=3-5 animals per group.  
51 Statistical significance is relative to B cell activation with LPS in the absence of CD4+ T cells  
52 (\*\*p<0.005, \*p<0.05, two-tailed Mann-Whitney *U* Test). Where applicable, error bars represent  
53 SEM.

54

55 **FIGURE S5. Phenotypic analysis of splenic CD4+Foxp3+ cells.** (A) Representative FACS plots of  
56 splenic CD4+ T cell phenotype showing CD69, PD-1 and CD40L expression. Gated on live, non-  
57 autofluorescent, CD4+ T cells. (B) Total CD4+ T cell compartment expression of CXCR5 and ICOS;  
58 Foxp3+ population represented on top panel, Foxp3- population represented on bottom panel. All  
59 data are representative of at least 3 independent experiments (n=3-5 animals per group).

60

61 **FIGURE S6. Intrahepatic accumulation of CD4+Foxp3+ T cells and incidence of spontaneous**  
62 **IgG production are independent of HCV viral load.** (A) Intrahepatic frequency of CD4+Foxp3+ T  
63 cells does not correlate with patient viremia (n=15), R= -0.18 (Spearman), p=0.52 (two tailed, *NS*).  
64 (B) Spontaneous IgG production by intrahepatic B cells does not correlate with patient viremia  
65 (n=15), R= -0.06 (Spearman), p=0.82 (two tailed, *NS*).

66

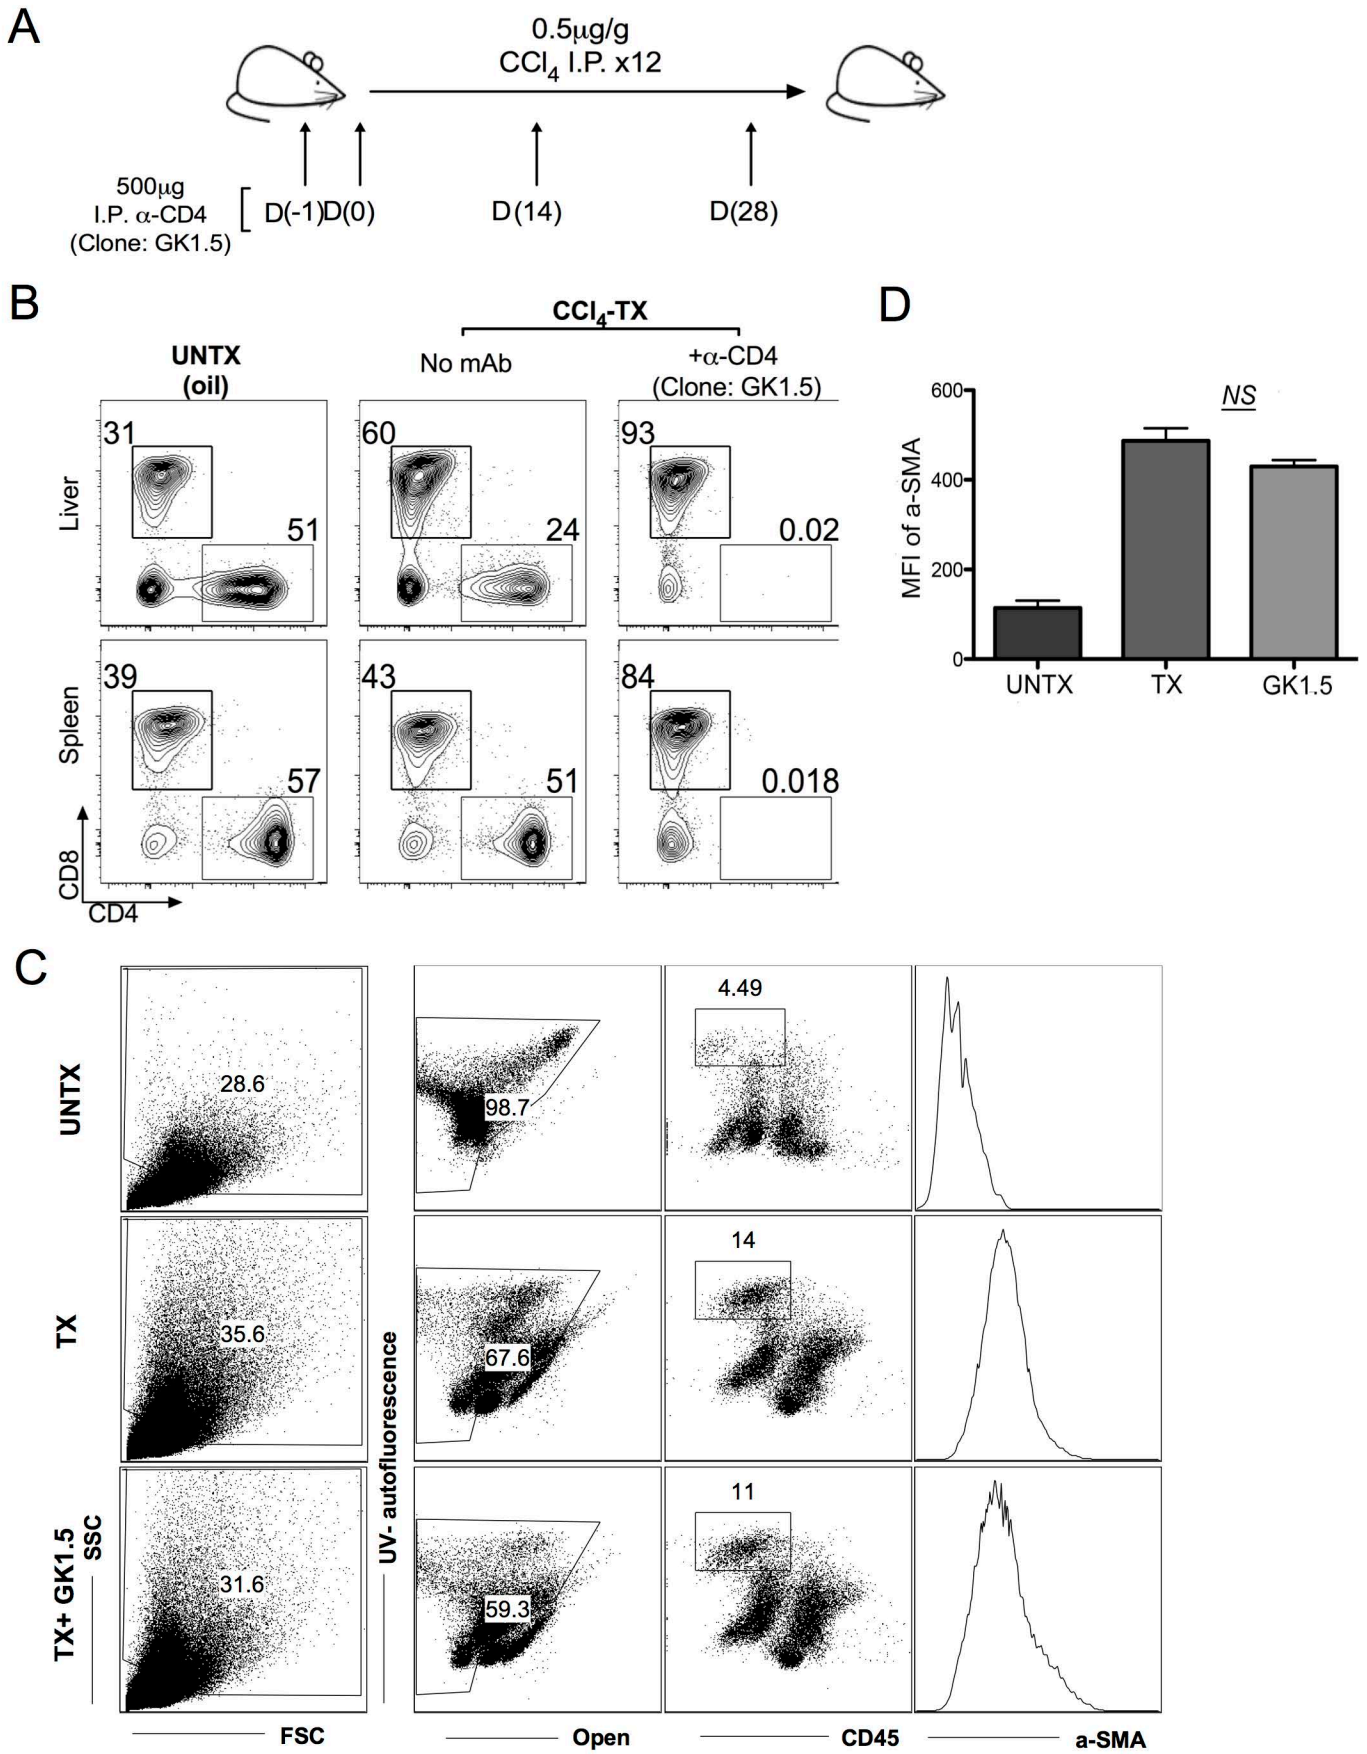

Supplementary Fig. S1

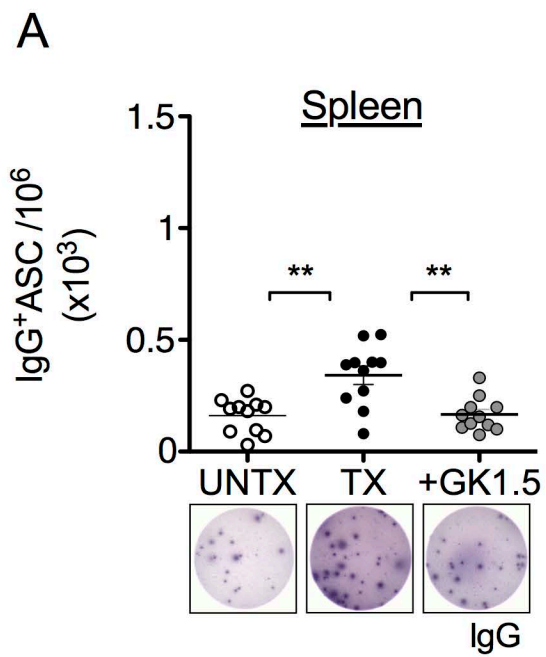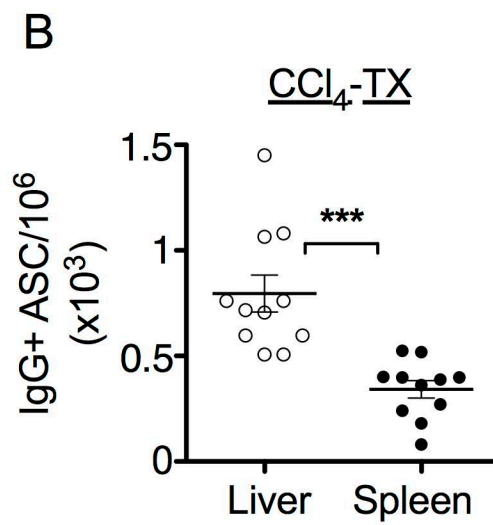

Supplementary Fig. S2.

A

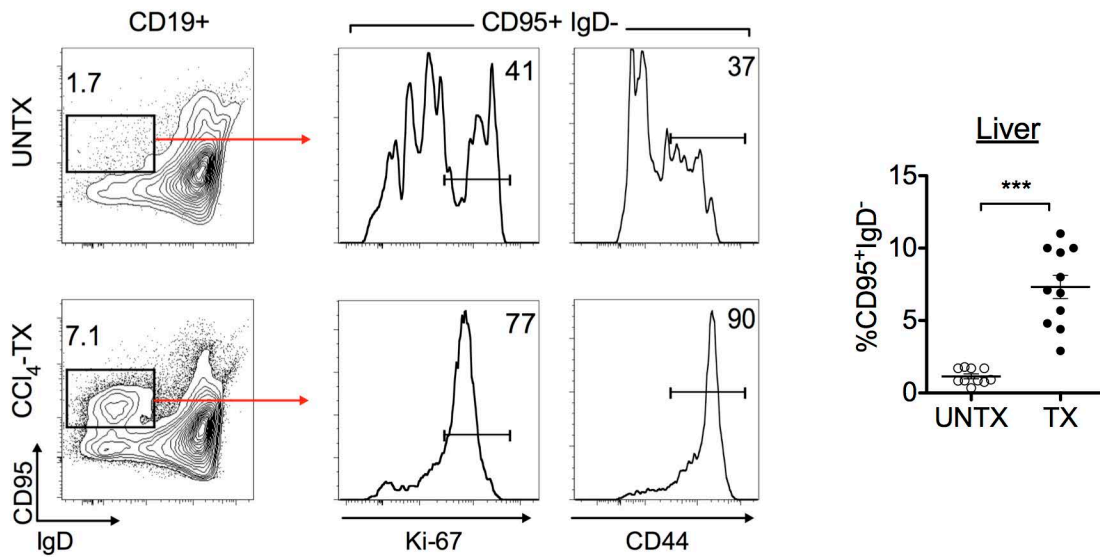

B

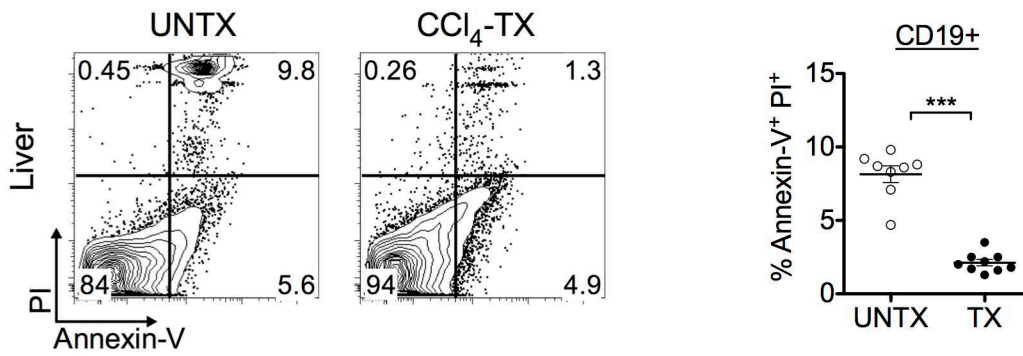

Supplementary Fig. S3.

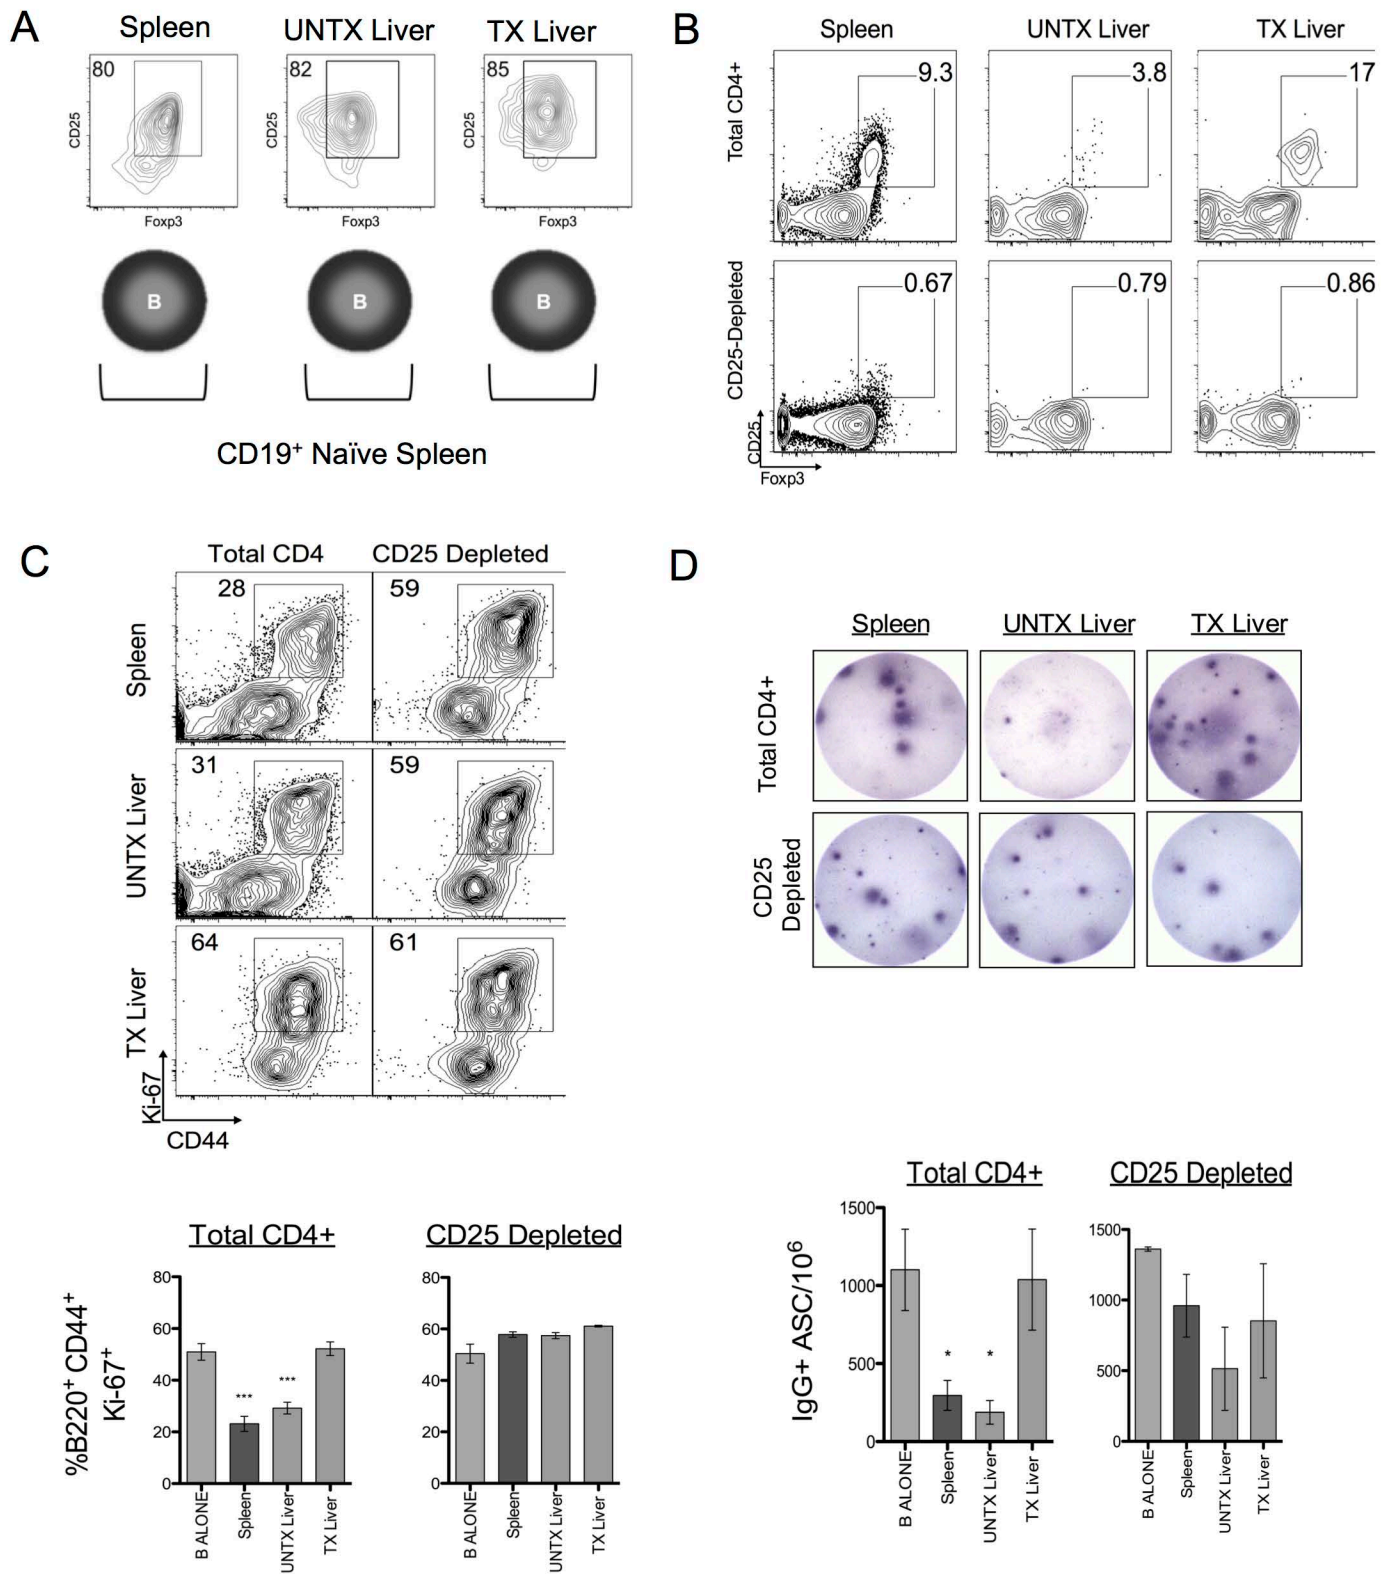

Supplementary Fig. S4.

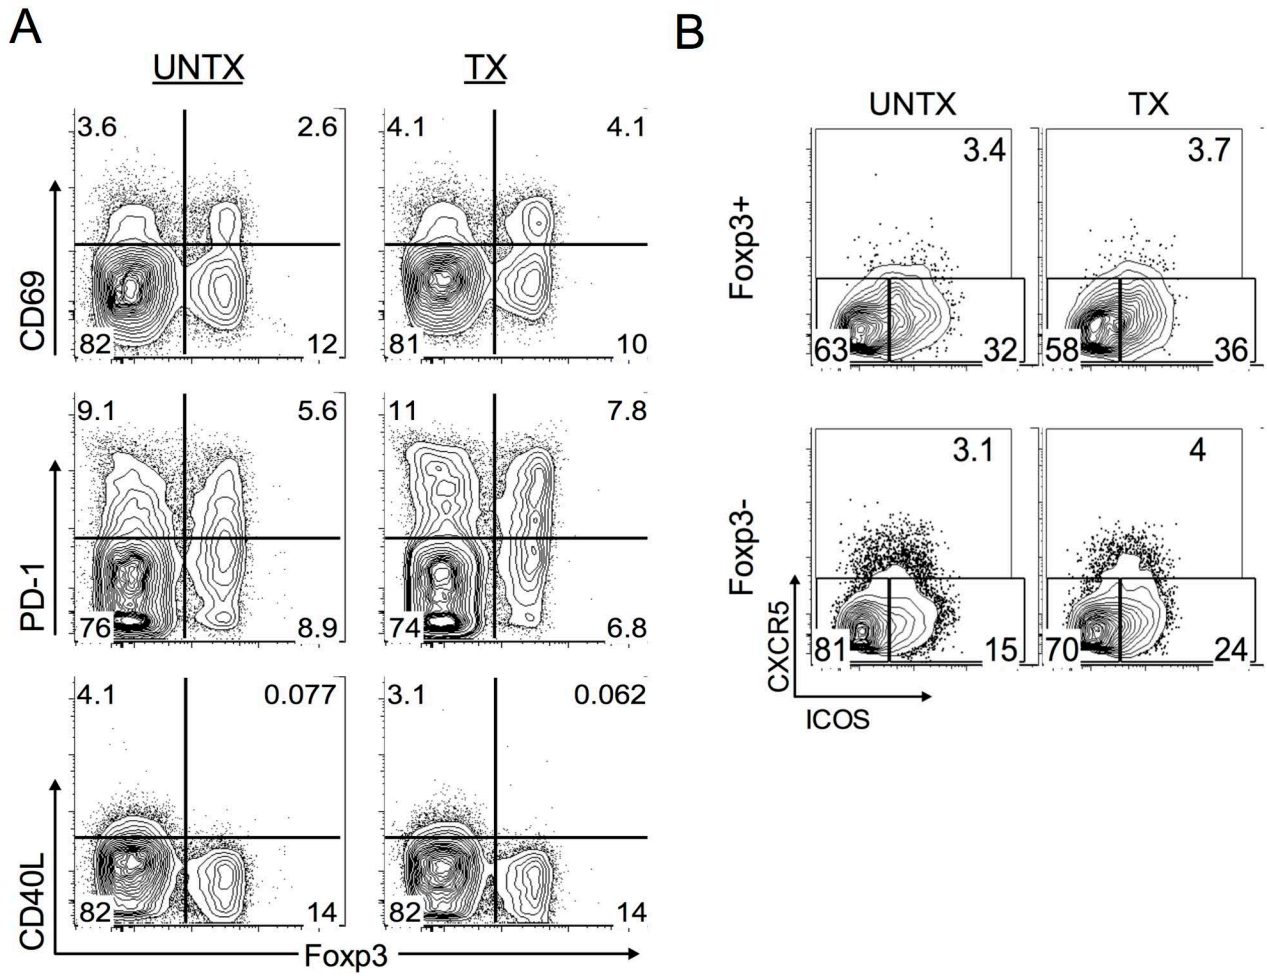

Supplementary Fig. S5.



A

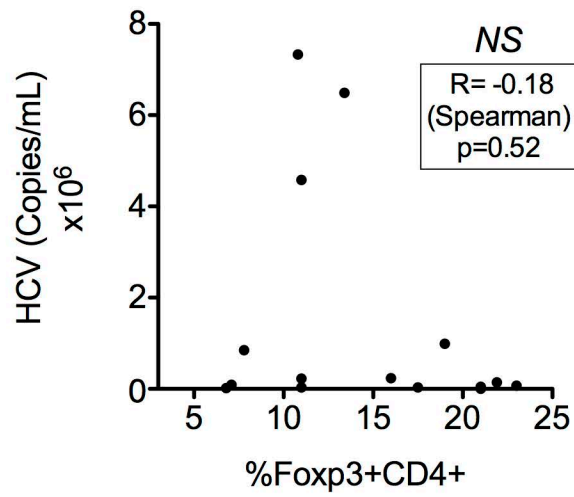

B

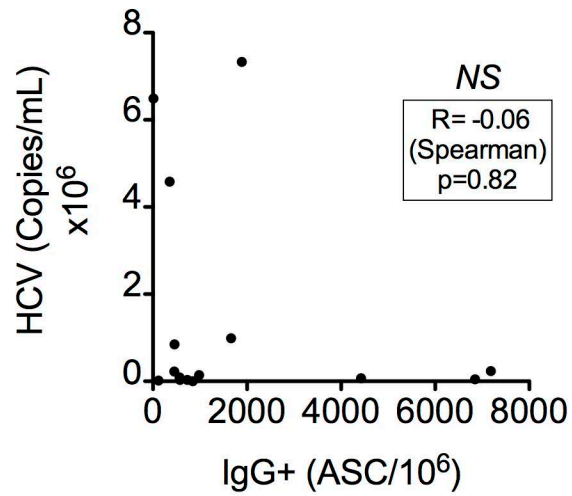

Supplementary Fig. S6.

Fibrosis Lesion Scoring (adapted from Ishak, et al. J Hepatology 1995; 22:696-9)

| Ishak Stage, Categorical description                                                 | Score |
|--------------------------------------------------------------------------------------|-------|
| No fibrosis                                                                          | 0     |
| Expansion of some portal areas with or without short fibrous septa                   | 1     |
| Expansion of most portal areas with or without short fibrous septa                   | 2     |
| Expansion of most portal areas with occasional portal to portal bridging             | 3     |
| Expansion of portal areas with marked bridging (portal-portal and/or portal-central) | 4     |
| Marked bridging with occasional nodules                                              | 5     |
| Cirrhosis, probable or definitive                                                    | 6     |

Histopathological Evaluation and Fibrosis Lesion Quantification

| Animal ID | Slide ID | H&E                                                                                                                                                                                                | Sirius red-Fibrosis score |
|-----------|----------|----------------------------------------------------------------------------------------------------------------------------------------------------------------------------------------------------|---------------------------|
| Group 1   | 1 C      | NSF*                                                                                                                                                                                               | 0                         |
|           | 2 C      | NSF                                                                                                                                                                                                | 0                         |
|           | 3 C      | NSF                                                                                                                                                                                                | 0                         |
|           | 4 C      | NSF                                                                                                                                                                                                | 0                         |
|           | 5 C      | NSF                                                                                                                                                                                                | 0                         |
| Group 2   | 1 Tx     | Multifocal moderate areas of hepatocellular necrosis, hydropic degeneration, periportal fibrosis with occasional portal to portal bridging and occasional mononuclear to neutrophilic infiltrates  | 3                         |
|           | 2 Tx     | Multifocal moderate areas of hepatocellular necrosis, hydropic degeneration, periportal fibrosis with occasional portal to portal bridging and occasional mononuclear to neutrophilic infiltrates  | 3                         |
|           | 3 Tx     | Multifocal extensive areas of hepatocellular necrosis, hydropic degeneration, periportal fibrosis with occasional portal to portal bridging and occasional mononuclear to neutrophilic infiltrates | 3                         |
|           | 4 Tx     | Multifocal moderate areas of hepatocellular necrosis, hydropic degeneration, periportal fibrosis with occasional portal to portal bridging and occasional mononuclear to neutrophilic infiltrates  | 3                         |
|           | 5 Tx     | Multifocal moderate areas of hepatocellular necrosis, hydropic degeneration, periportal fibrosis with occasional portal to portal bridging and occasional mononuclear to neutrophilic infiltrates  | 3                         |
| Group 3   | 1 GK+Tx  | Multifocal extensive areas of hepatocellular necrosis, hydropic degeneration, periportal fibrosis with occasional portal to portal bridging and occasional mononuclear to neutrophilic infiltrates | 3                         |
|           | 2 GK+Tx  | Multifocal extensive areas of hepatocellular necrosis, hydropic degeneration, periportal fibrosis with occasional portal to portal bridging and occasional mononuclear to neutrophilic infiltrates | 3                         |
|           | 3 GK+Tx  | Multifocal moderate areas of hepatocellular necrosis, hydropic degeneration, periportal fibrosis with occasional portal to portal bridging and occasional mononuclear to neutrophilic infiltrates  | 3                         |
|           | 4 GK+Tx  | Multifocal moderate areas of hepatocellular necrosis, hydropic degeneration, periportal fibrosis with occasional portal to portal bridging and occasional mononuclear to neutrophilic infiltrates  | 3                         |
|           | 5 GK+Tx  | Multifocal moderate areas of hepatocellular necrosis, hydropic degeneration, periportal fibrosis with occasional portal to portal bridging and occasional mononuclear to neutrophilic infiltrates  | 3                         |

\* NSF: no significant findings; C: oil-treated control, Tx: CCl<sub>4</sub>-treated, and GK+Tx: CCl<sub>4</sub>+ GK1.5 antibody treated.

| Donor ID | Age | Sex | Cirrhosis | Dx  | HCC | HCV RNA (Copies/mL) | ALT |
|----------|-----|-----|-----------|-----|-----|---------------------|-----|
| ET101    | 48  | M   | YES       | HCV | YES | 80000               | 42  |
| ET104    | 53  | M   | YES       | HCV | YES | 7330000             | 137 |
| ET108    | 60  | M   | YES       | HCV | YES | 233000              | 45  |
| ET180    | 63  | M   | YES       | HCV | YES | 68700               | 42  |
| ET196    | 70  | M   | YES       | HCV | NO  | 31500               | 29  |
| ET239    | 57  | M   | YES       | HCV | YES | 3400                | 27  |
| ET245    | 47  | M   | YES       | HCV | YES | 46900               | 37  |
| ET261    | 66  | M   | YES       | HCV | YES | 4580000             | 93  |
| ET262    | 61  | F   | YES       | HCV | NO  | 847000              | 71  |
| ET264    | 53  | F   | YES       | HCV | NO  | 225000              | 30  |
| ET303    | 67  | M   | YES       | HCV | YES | 16300               | 99  |
| ET308    | 60  | M   | YES       | HCV | YES | 989000              | 38  |
| ET316    | 66  | F   | YES       | HCV | YES | 44600               | 26  |
| ET330    | 50  | M   | YES       | HCV | YES | 30400               | 28  |
| ET334    | 49  | M   | YES       | HCV | YES | 1420000             | 64  |
| ET371    | 59  | M   | YES       | HCV | YES | Undet*              | 30  |

**Supplementary Table 2. Clinical characteristics HCV patients in this study.** Explanted cirrhotic liver tissues from HCV infected patients undergoing orthotopic liver transplantation were obtained following informed written consent. Abbreviations: Dx= diagnosis; Undet= undetectable plasma viral load; HCV= hepatitis C virus; HCC= hepatocellular carcinoma; ALT= alanine aminotransferase. Asterisk (\*) indicates that donor was treated for HCV infection with PEG-IFNa/Ribavirin course prior to liver transplant.

| Donor ID | Age     | Sex     | Cirrhosis | HCV      | HCC | Dx                                                       | ALT     |
|----------|---------|---------|-----------|----------|-----|----------------------------------------------------------|---------|
| ET195    | 42      | M       | NO        | NEGATIVE | NO  | Resection/<br>Cholangiocarcinoma                         | 35      |
| ET203    | 42      | F       | NO        | NEGATIVE | NO  | Resection/<br>Hemangioendothelioma                       | 30      |
| ET222    | 40      | M       | NO        | NEGATIVE | NO  | Resection/<br>Cholangiocarcinoma                         | 45      |
| ET321    | 24      | M       | NO        | NEGATIVE | NO  | Resection/ Negative                                      | 32      |
| ET322    | Unknown | Unknown | NO        | NEGATIVE | NO  | Donor liver, resected to accommodate pediatric recipient | Unknown |
| ET331    | 47      | M       | NO        | NEGATIVE | NO  | Resection/ Negative                                      | 38      |

**Supplementary Table 3. Clinical characteristics non-fibrotic control subjects in this study.** Liver tissues were obtained following informed written consent from patients undergoing surgical re-sectioning for non-HCV, non-NAFLD, non-ALD related medical treatments or re-sectioned donor liver to accommodate pediatric recipient. Livers were considered non-fibrotic as medical staff did not diagnose cirrhosis in these specimens. Abbreviations: Dx= diagnosis; HCV= hepatitis C virus; HCC= hepatocellular carcinoma; ALT= alanine aminotransferase.
